# Supplementary material for: Gut microbiota modulate dendritic cell antigen presentation and radiotherapy-induced antitumor immune response
Source: JCI journal article supplement (doi:10.1172/jci124332), 2019-12-08
Supplement: sd1 [file 1]

### Supplementary Figures

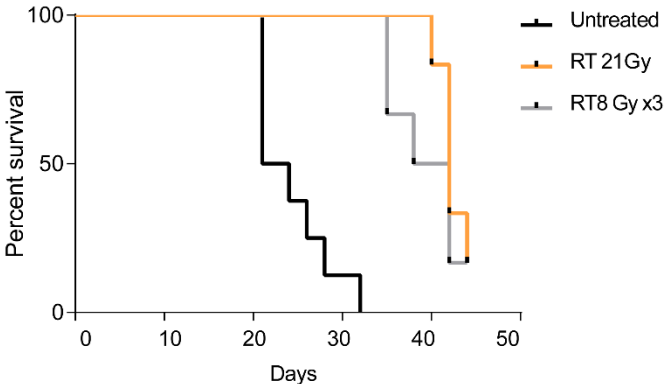

Supplementary Figure 1. Survival plot of mice receiving two different radiation dose treatment: a single dose of 21 Gy or 3 doses of 8 Gy. Includes animals that died or reached the tumor volume average. 6 to 8 mice per group. Statistical significance was assessed by log-rank test.

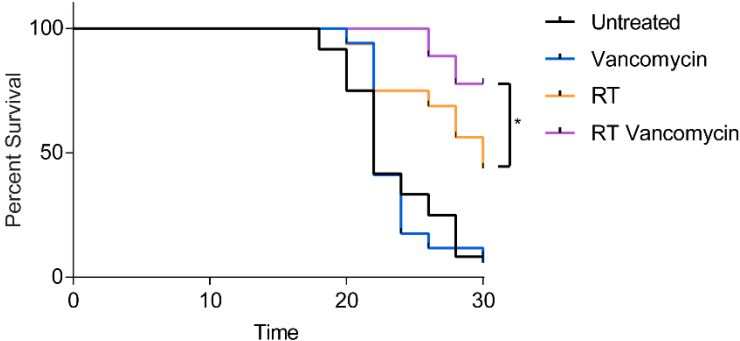

Supplementary Figure 2. Survival plot of mice receiving no treatment (untreated), RT treatment alone (RT), or vancomycin plus RT combination treatment (RT+Vanco). 12 to 18 mice per group. Statistical significance was assessed by log-rank test (\* $P < 0.05$ ).

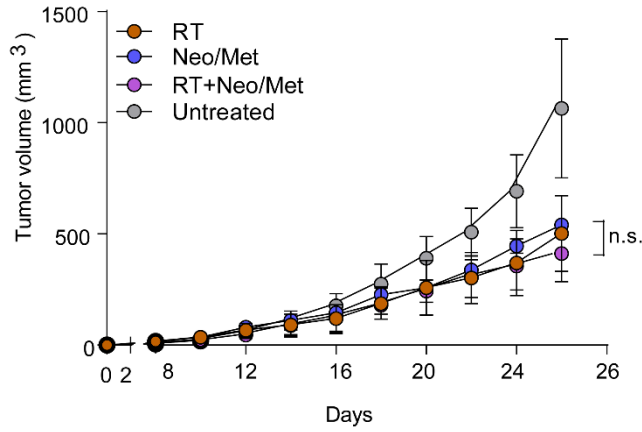

Supplementary Figure 3. Growth curves of B16-OVA irradiated primary tumors from mice receiving no treatment (untreated), Neo/Met treatment alone (Neo/Met), RT treatment alone (RT), or Neo/Met plus RT combination treatment. 5 to 10 mice per group. Mean +/- SEM are shown. Statistical significance was assessed by two-way ANOVA.

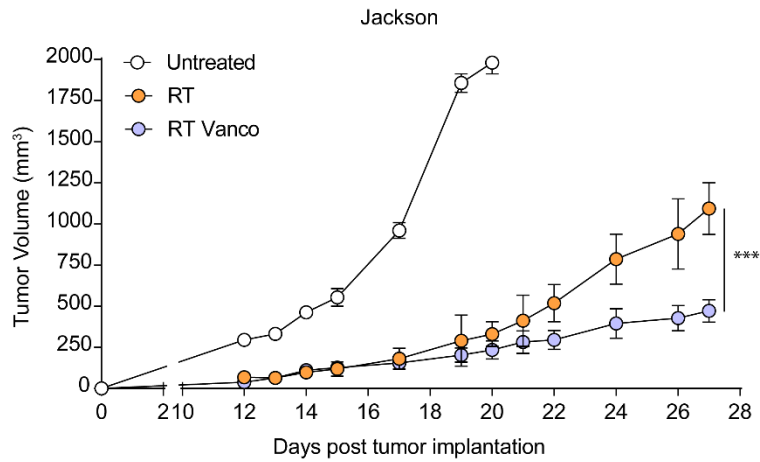

Supplementary Figure 4. Growth curves of B16-OVA irradiated primary tumors from mice purchased from Jackson laboratories receiving no treatment (untreated), RT treatment alone (RT), or vancomycin plus RT combination treatment (RT+Vanco). 5 to 10 mice per group. Mean +/- SEM are shown. Statistical significance was assessed by two-way ANOVA (\*\* $P < 0.001$ ).

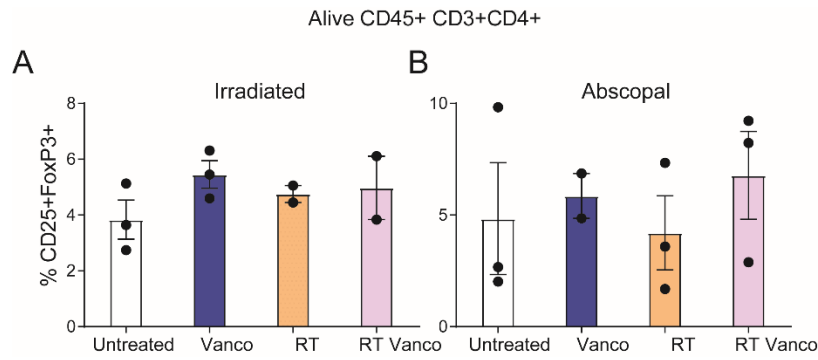

Supplementary Figure 5. Analysis of intra-tumoral Tregs (A) Irradiated and (B) Abscopal tumor from mice treated with each therapeutic approach. Each dot represents a pool of 3 mice. Mean +/- SEM are shown. Statistical significance was assessed by Tukey's test.

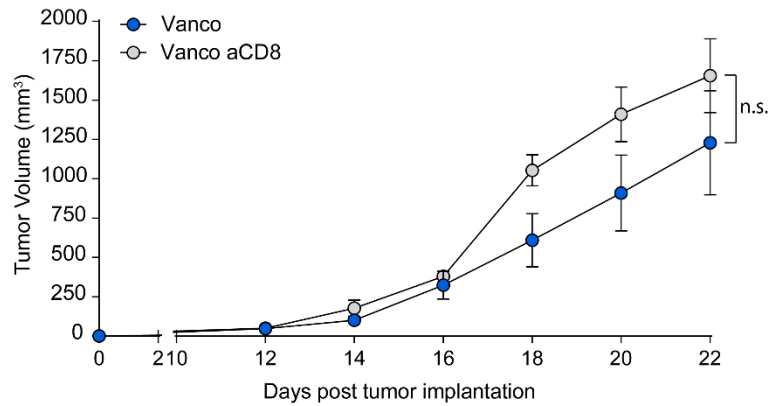

Supplementary Figure 6. Effects of CD8 T cells depletion on B16-OVA primary tumor growth in mice treated with vancomycin. Data are representative of at least two independent experiments. 5 to 10 mice per group. Mean +/- SEM are shown. Statistical significance was assessed by two-way ANOVA.

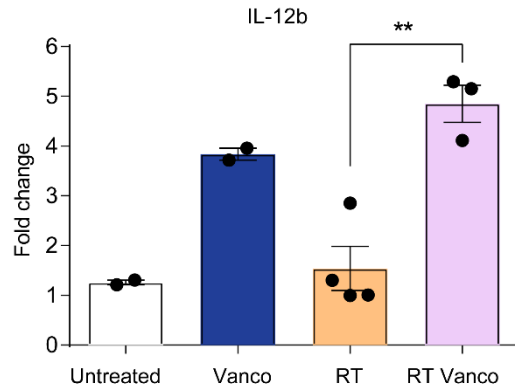

Supplementary Figure 7. *Il12b* mRNA expression levels in tumors one day after irradiation. Results are depicted as fold change expression compared to untreated mice. 2 to 4 mice per group. Mean +/- SEM are shown. Statistical significance was assessed by Tukey's test. (\*\* $P < 0.01$ ).

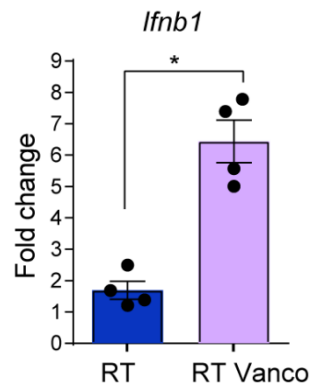

Supplementary Figure 8. *Ifnb1* mRNA expression levels in tumors one day after irradiation. Results are shown as fold change expression compared to untreated mice. Data are representative of at least two independent experiments. 4 to 6 mice per group. Mean +/- SEM are shown. Statistical significance was assessed by unpaired t-test (\* $P < 0.05$ ).

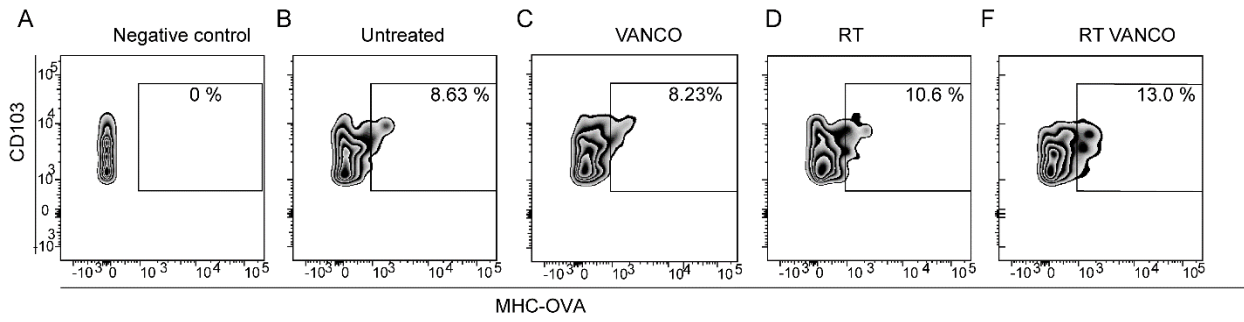

Supplementary Figure 9. Example of flow cytometry dot plot of anti-MHC1 (Kb)-SL8 OVA peptide staining performed at 3-day post irradiation.

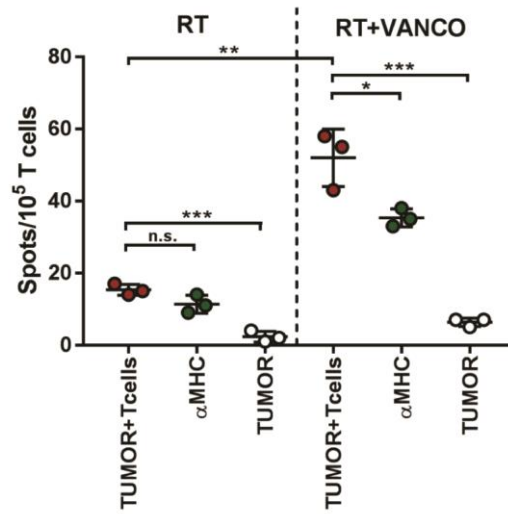

Supplementary Figure 10. TC-1 tumors from mice treated with RT alone or in combination with vancomycin were dissociated and plated with OT1 T cells in an IFN $\gamma$  ELISpot plate for 24h. 3 mice per group. Mean  $\pm$  SEM are shown. Statistical significance was assessed by Tukey's test (\* $P$  < 0.05, \*\* $P$  < 0.01, \*\*\* $P$  < 0.001).

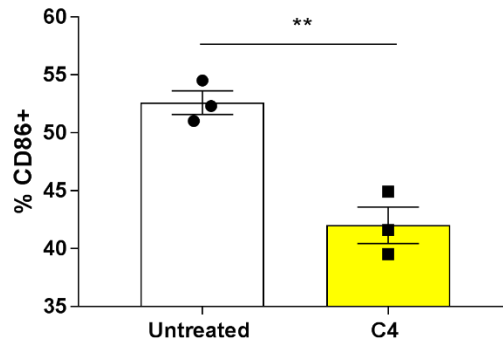

Supplementary Figure 11. Phenotypic characterization of BMDC CD11c+ upon exposure to butyrate (C4). Each dot represents BMDC derived from a different mouse (3 total). Mean +/- SEM are shown. Statistical significance was assessed by unpaired t-test (\*\* $P < 0.01$ ).

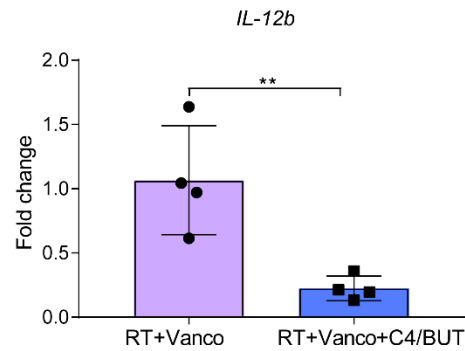

Supplementary Figure 12. *Il12b* mRNA expression level in irradiated tumors from mice treated with vancomycin in combination with or without butyrate (C4). 4 mice per group. Mean +/- SEM are shown. Statistical significance was assessed by unpaired t-test (\*\* $P < 0.01$ ).
